# Supplementary material for: Template control in ionothermal synthesis of aluminophosphate microporous materials
Source: Royal Society of Chemistry journal article supplement (doi:10.1039/b912785b), 2009-01-01
Supplement: b912785b.pdf [file b912785b.pdf]

## Supplementary Material

### Template Control in Ionothermal Synthesis of Aluminophosphate Microporous Materials

Lei Liu, Xiping Li, Hong Xu, Jinping Li, Zhi Lin and Jinxiang Dong\*

**Synthesis of eutectic solvents (EU)**. The required amount of as bought pentaerythritol and quaternary ammonium salt was measured out and ground in a mortar. Melting points of the different EU are given in Table S1.

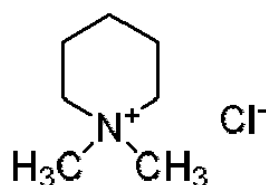

1,1-dimethylpiperidinium chloride  
(DMPCI)

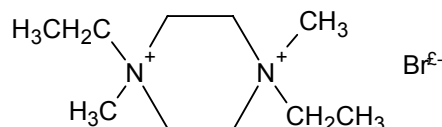

1,4-diethyl-1,4-dimethylpiperazinium  
dibromide (DMEPBr)

Table S1. Melting points of the deep eutectic solvents and their constituent compounds

| Hydrogen bond donor(g)<br>Mp(°C) | Quaternary ammonium salt (g)<br>Mp (°C)                      | EU Mp (°C) |
|----------------------------------|--------------------------------------------------------------|------------|
| Pentaerythritol (1.0) 253-258    | choline chloride (3.0) 302-305                               | 80         |
| Pentaerythritol (2.7) 253-258    | tetraethylammonium bromide (2.0) 285-290                     | 94         |
| Pentaerythritol (2.0) 253-258    | 1,4-diethyl-1,4-dimethylpiperazinium dibromide (2.5) 158-162 | 87         |
| Pentaerythritol (2.0) 253-258    | 1,1-Dimethylpiperidinium chloride (2.2) 286-290              | 120        |

Table S2. Elemental analysis results for five synthesised samples

| Samples               | Elemental analysis results (wt %) <sup>a</sup> |            |            |             |             |            |
|-----------------------|------------------------------------------------|------------|------------|-------------|-------------|------------|
|                       | C                                              | H          | N          | Al          | P           | F          |
| UiO-7                 | 10.64 (9.82)                                   | 2.22(2.30) | 2.40(2.30) | 17.16(17.7) | 19.57(20.3) | 2.98(3.11) |
| AlPO <sub>4</sub> -17 | 10.86(10.64)                                   | 2.40(2.18) | 1.73(1.77) | 17.75(18.1) | 21.14(20.8) | 2.56(2.41) |
| AlPO <sub>4</sub> -22 | 8.47(9.4)                                      | 1.89(1.85) | 1.38(1.6)  | 18.61(18.1) | 23.34(22.5) | -          |
| AlPO <sub>4</sub> -5  | 6.90(7.0)                                      | 1.76(1.46) | 0.98(1.02) | 20.02(19.7) | 22.33(22.6) | 1.50(1.39) |
| SIZ-10                | 12.64(12.7)                                    | 2.75(2.55) | 3.02(2.97) | 16.88(17.2) | 19.92(19.7) | 3.81(4.03) |

<sup>a</sup>Theoretical value calculated from chemical formula in parenthesis for corresponding element.

### Characterisation details for the different aluminophosphate materials

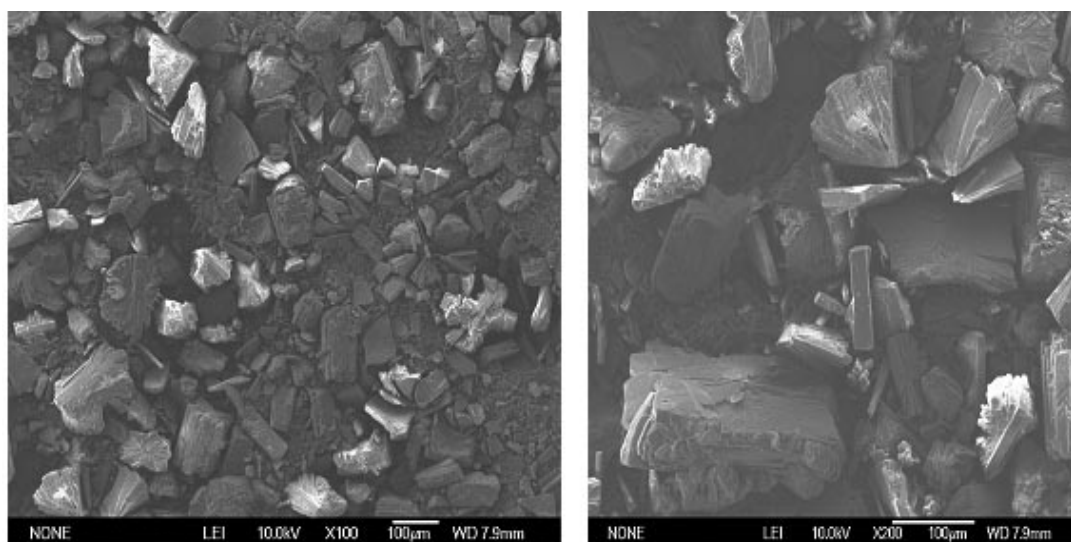

(A)

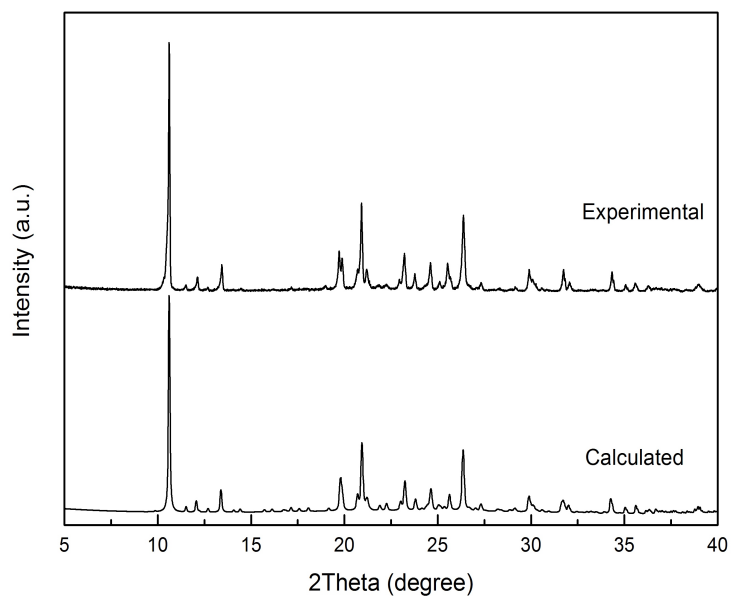

(B)

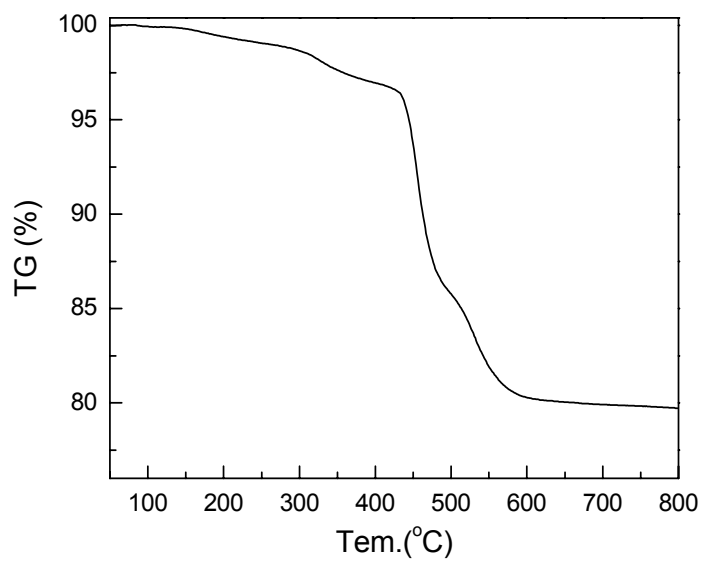

(C)

Figure S1 Characterisation details for UiO-7 prepared with choline chloride containing EU. (A) SEM, (B) calculated and experimental XRD patterns and (C) TG

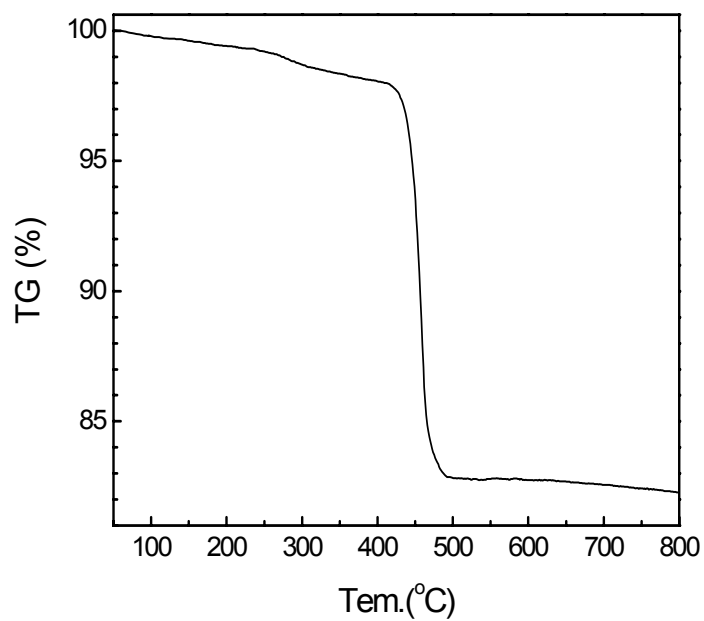

Figure S2 TG curve for AlPO<sub>4</sub>-17 templated 1,1-dimethylpiperidinium chloride in the presence of HF.

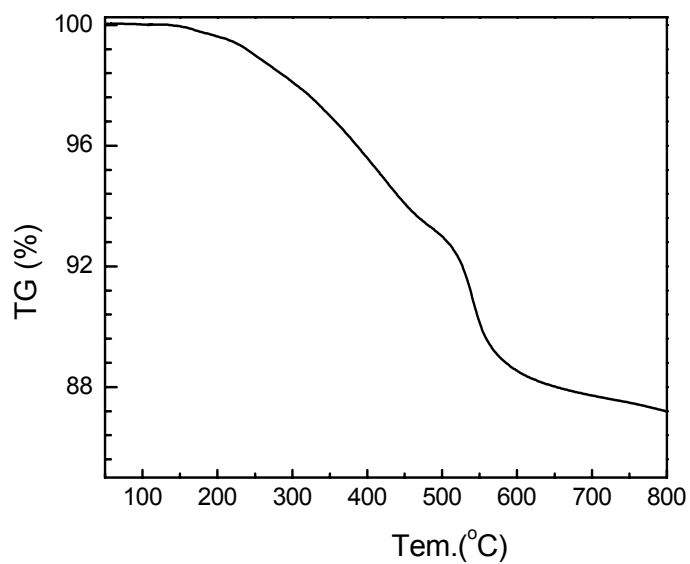

Figure S3 TG curve for AlPO<sub>4</sub>-22 templated 1,1-dimethylpiperidinium chloride in the absence of HF

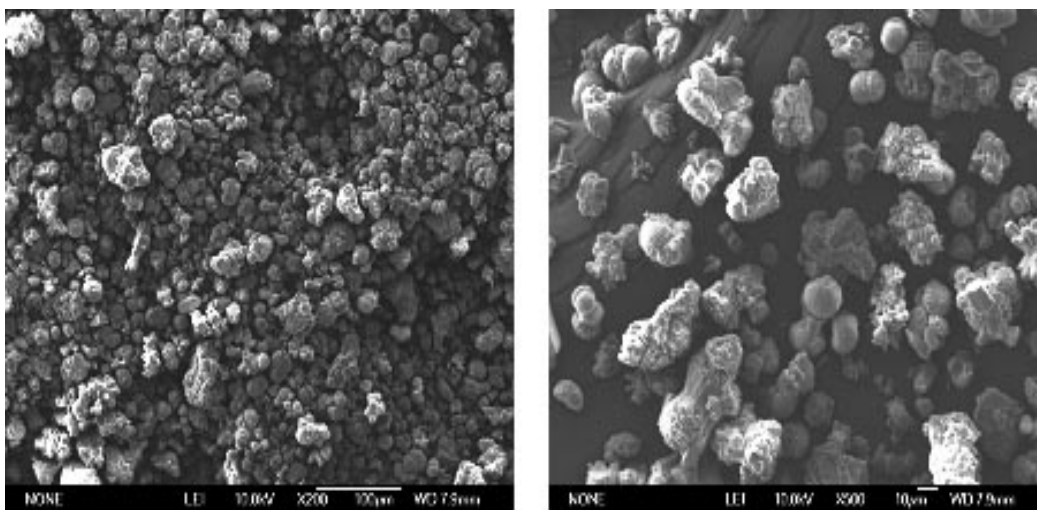

(A)

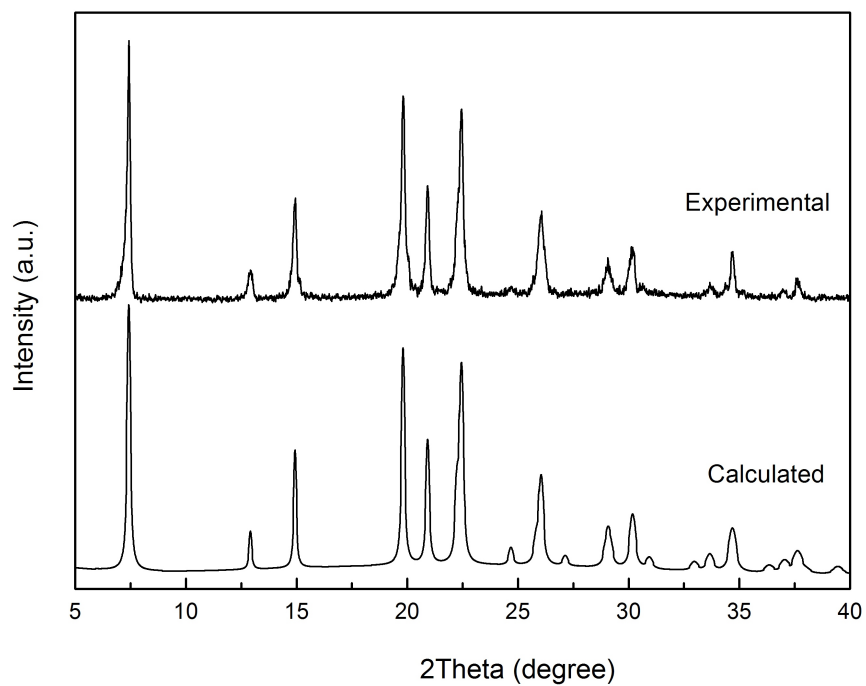

(B)

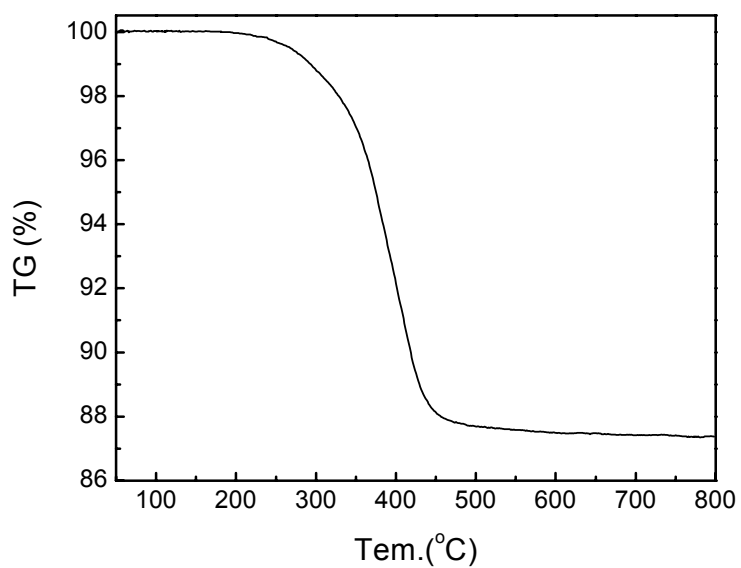

(C)

Figure S4 Characterisation details for  $\text{AlPO}_4\text{-5}$  prepared with tetraethylammonium bromide containing EU. (A) SEM, (B) calculated and experimental XRD patterns and (C) TG

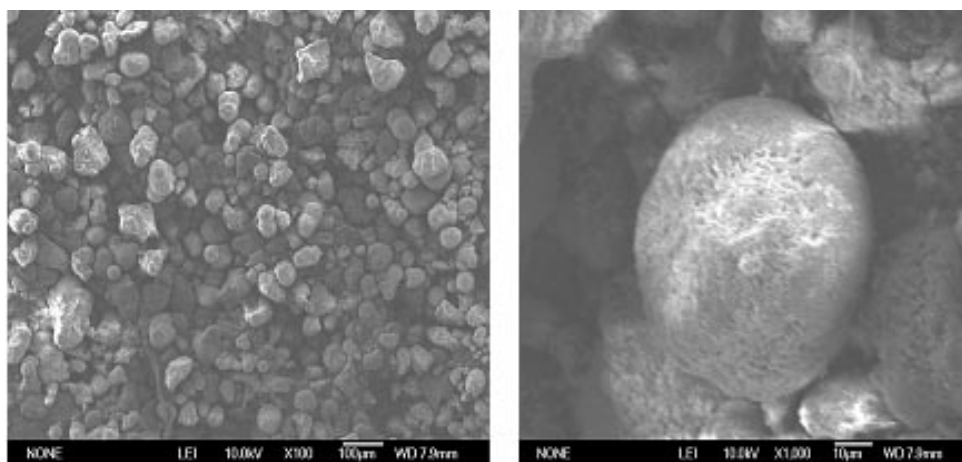

(A)

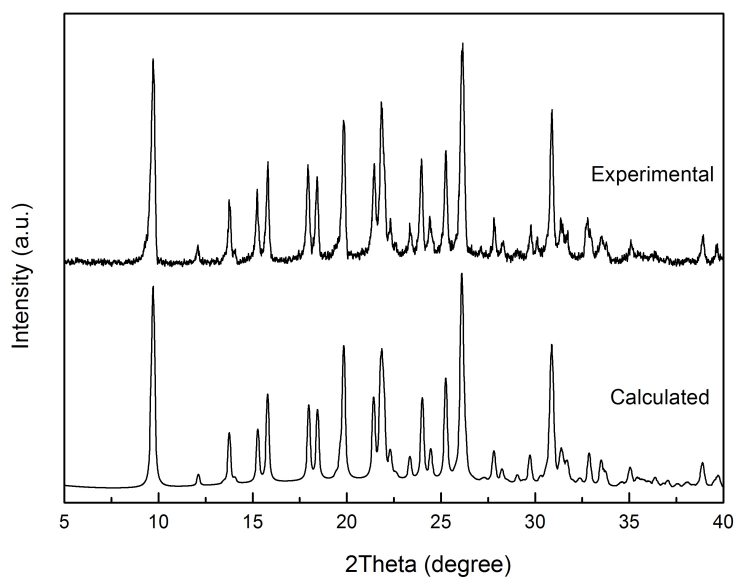

(B)

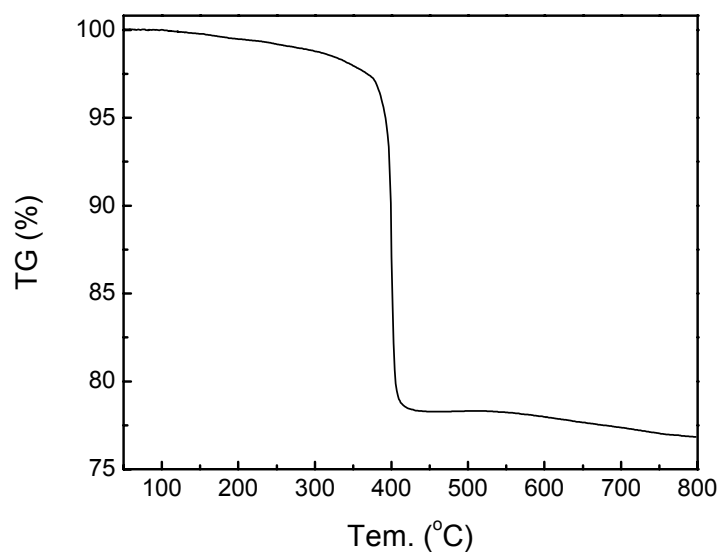

(C)

Figure S5 Characterisation details for SIZ-10 prepared with 1,4-diethyl-1,4-dimethylpiperazinium dibromide containing EU. (A) SEM, (B) calculated and experimental XRD patterns and (C) TG

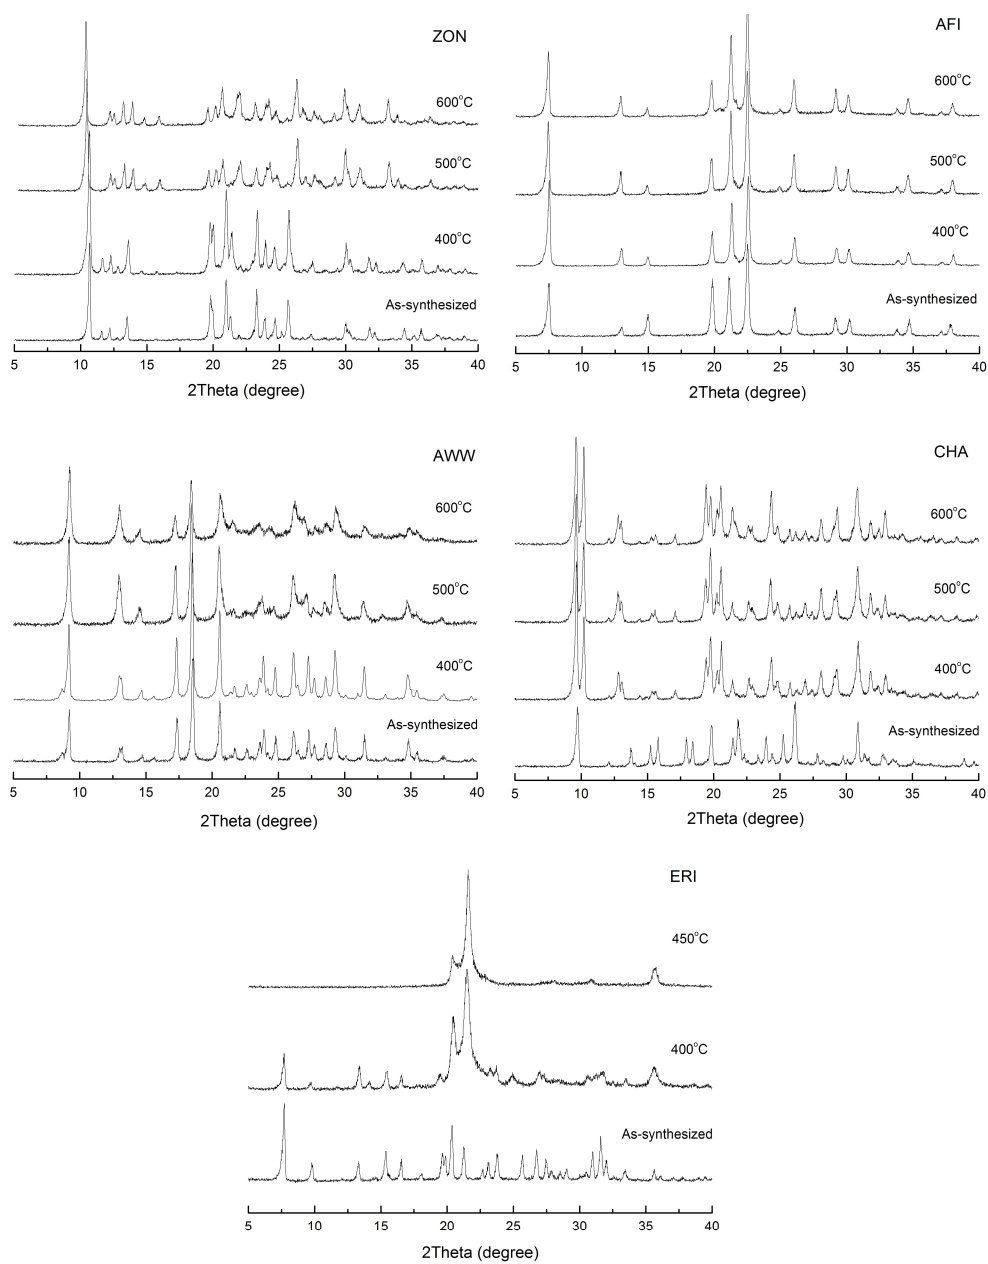

Figure S6 Powder XRD patterns of obtained samples after heat treated at different temperatures.
